# Supplementary material for: CircRNA_0000392 promotes colorectal cancer progression through the miR-193a-5p/PIK3R3/AKT axis
Source: Springer Nature journal article supplement (doi:10.1186/s13046-020-01799-1), 2020-12-01
Supplement: MOESM1 [file 18681944]

## Supplementary Figures

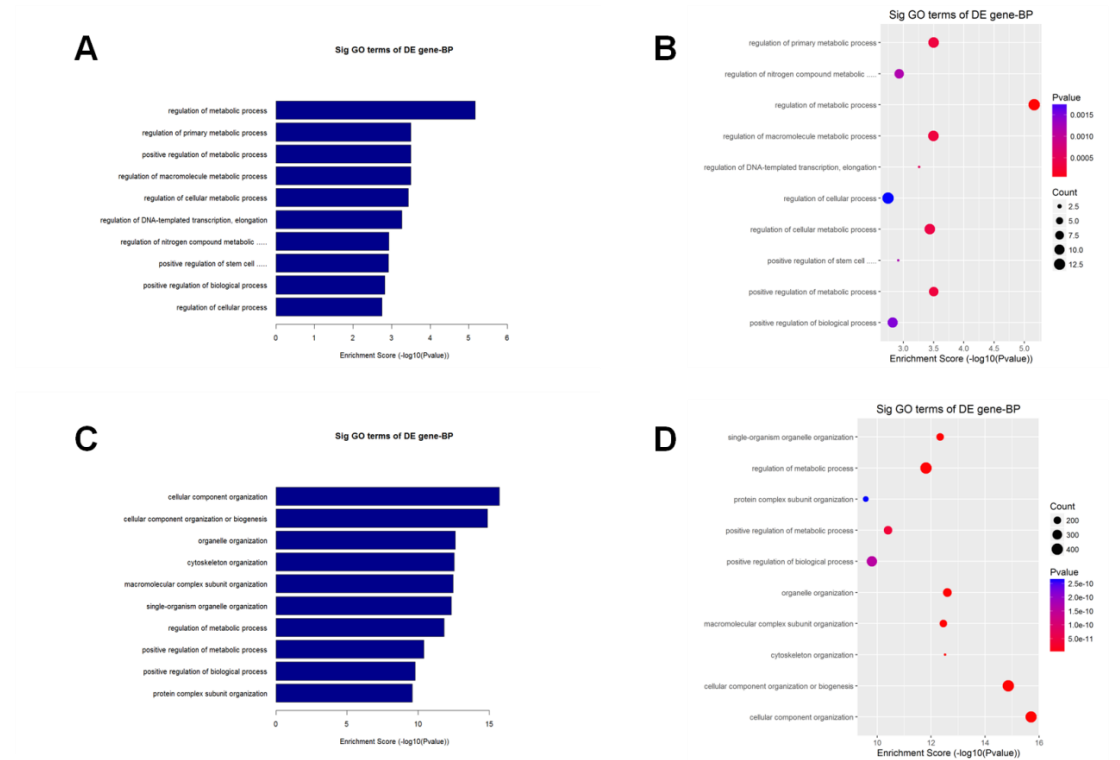

**Supplementary Fig. 1. GO analyses of the host genes of differentially expressed circRNAs. (A-B)** GO annotations of the host genes of significantly upregulated expressed circRNAs. **(C-D)** GO annotations of the host genes of significantly downregulated expressed circRNAs.

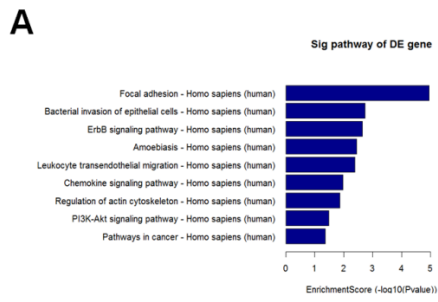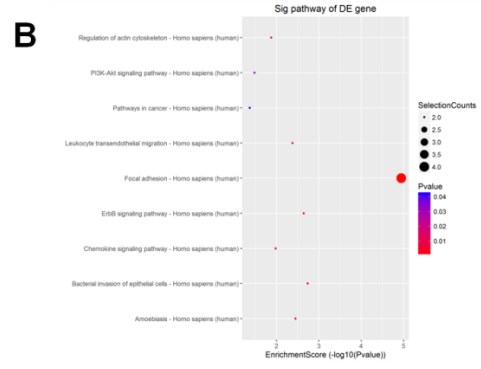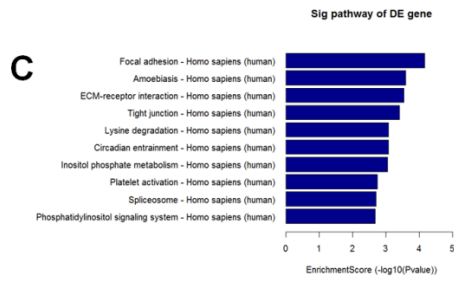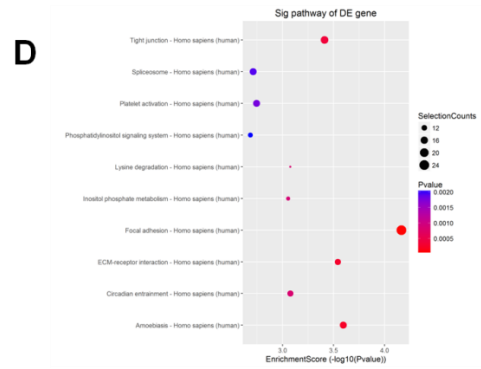

**Supplementary Fig. 2. KEGG analyses of the host genes of differentially expressed circRNAs. (A-B) KEGG analyses of the host genes of significantly upregulated expressed circRNAs. (C-D) KEGG analyses of the host genes of significantly downregulated expressed circRNAs.**

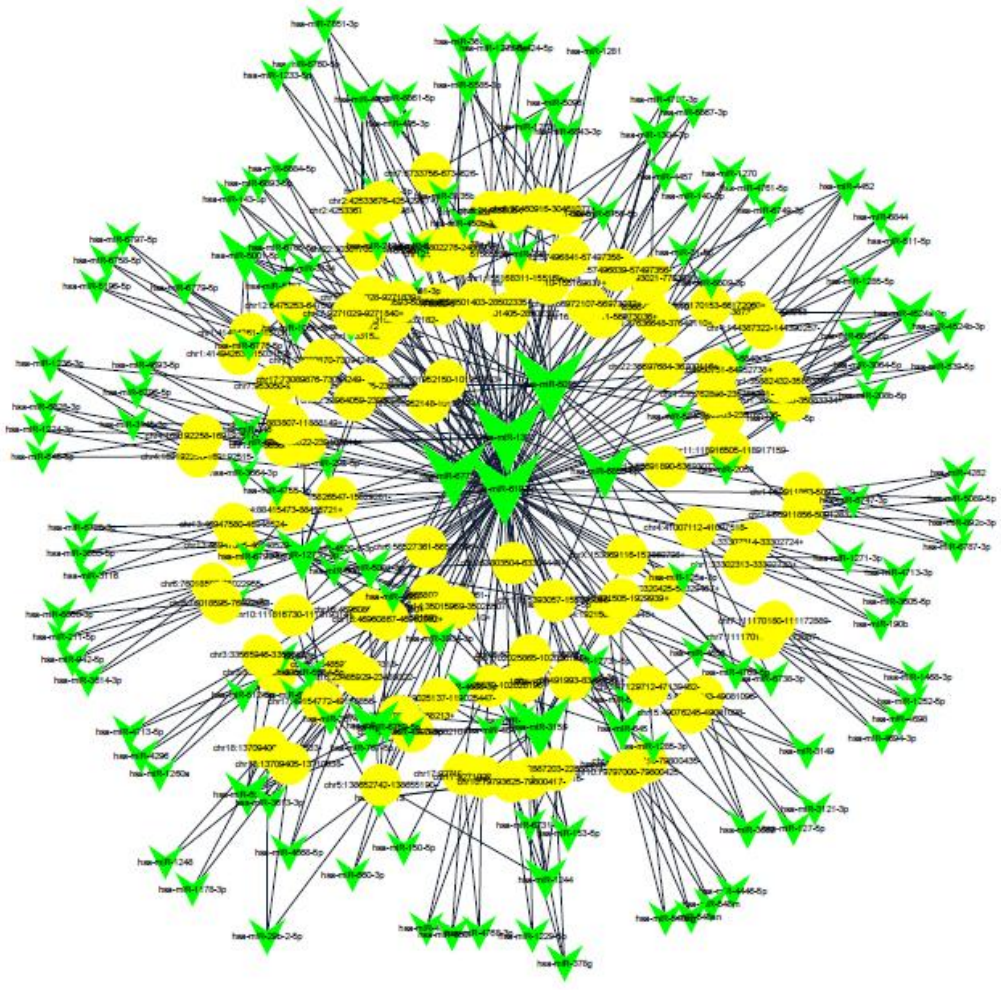

**Supplementary Fig. 3.** CircRNA-miRNA network maps were constructed using Cytoscape software based on significant differential expression of circRNAs to demonstrate their interaction.

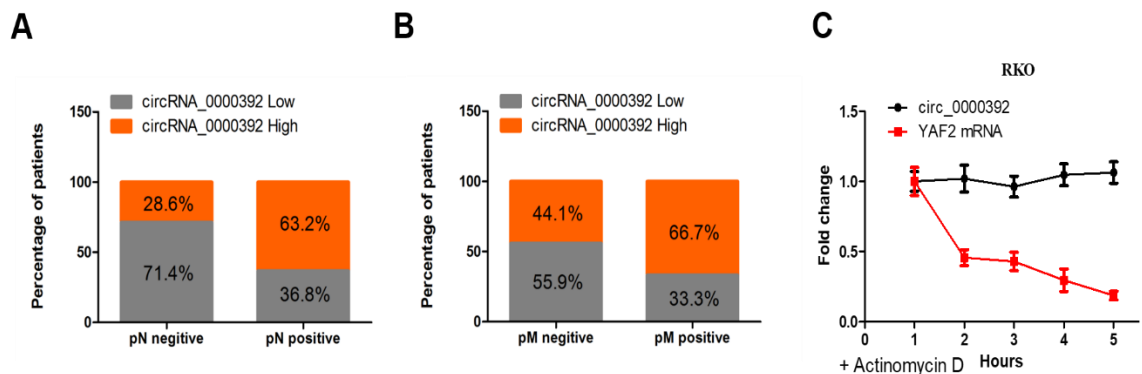

**Supplementary Fig. 4.** Analysis of circRNA\_0000392 expression in CRC patients with or without lymph node metastasis (A) and CRC patients with or without distant metastasis (B). (C) qRT-PCR analysis of circRNA\_0000392 and YAF2 mRNA in RKO cells treated

with actinomycin D at the indicated time points.

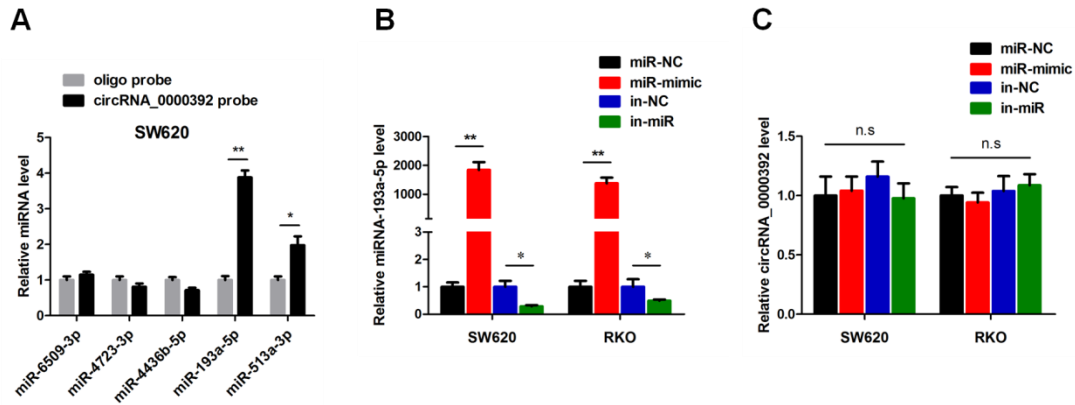

**Supplementary Fig. 5. (A)** The top five miRNAs may regulated by circRNA\_0000392 base on the miRNA prediction and bioinformatics analyses were showed and measured by qRT-PCR after the pull – down assay in SW620 cells. **(B)** Relative expression of miR-193a-5p after transfected with the mimics or inhibitor was measured by qRT-PCR. **(C)** Relative expression of circRNA\_0000392 after transfected with the mimics or inhibitor was measured by qRT-PCR.

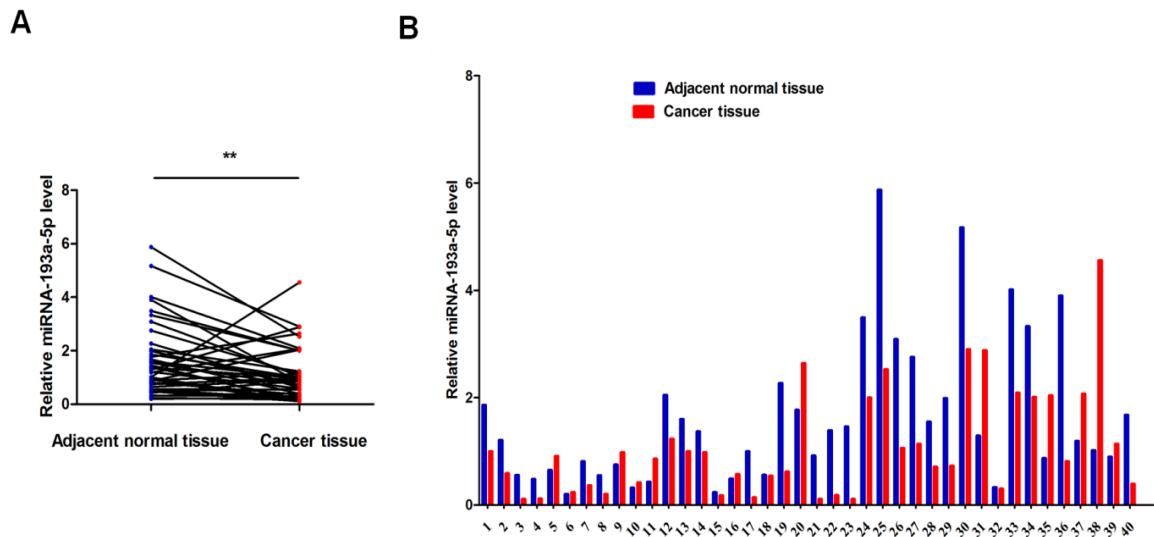

**Supplementary Fig. 6. (A-B)** Relative expression of miR-193a-5p in 40 pairs of CRC and ANT tissues measured by qRT-PCR.

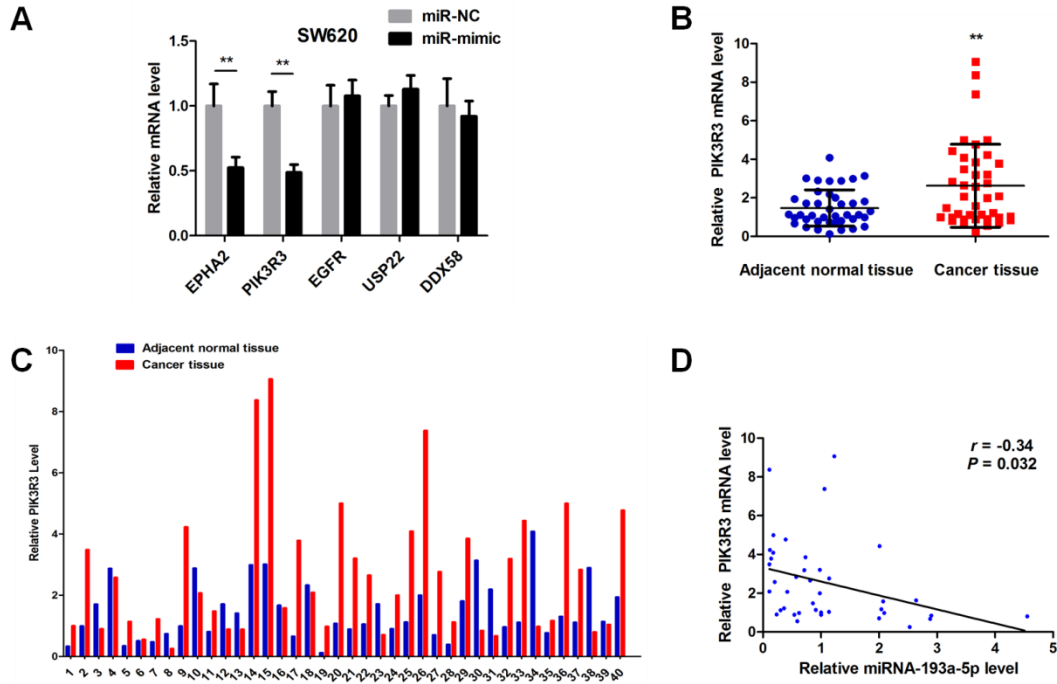

**Supplementary Fig. 7. (A)** The relative mRNA expression of EPHA2, PIK3R3, EGFR, USP22 and DDX58 after transfected with the miR-193a-5p mimics was detected in SW620 cells by qRT-PCR. **(B-C)** Relative mRNA expression of PIK3R3 in 40 pairs of CRC and ANT tissues measured by qRT-PCR. **(D)** The correlation between miR-193a-5p and PIK3R3 in CRC tissues was analyzed by Spearman correlation coefficients.

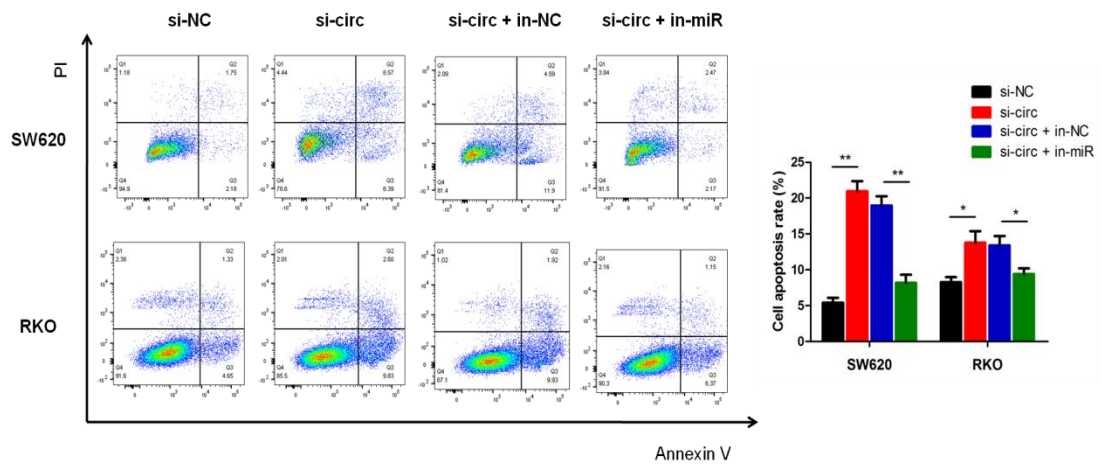

**Supplementary Fig. 8.** Apoptosis rate was analyzed by flow cytometry after transfection the indicated plasmids in SW620 and RKO cells.

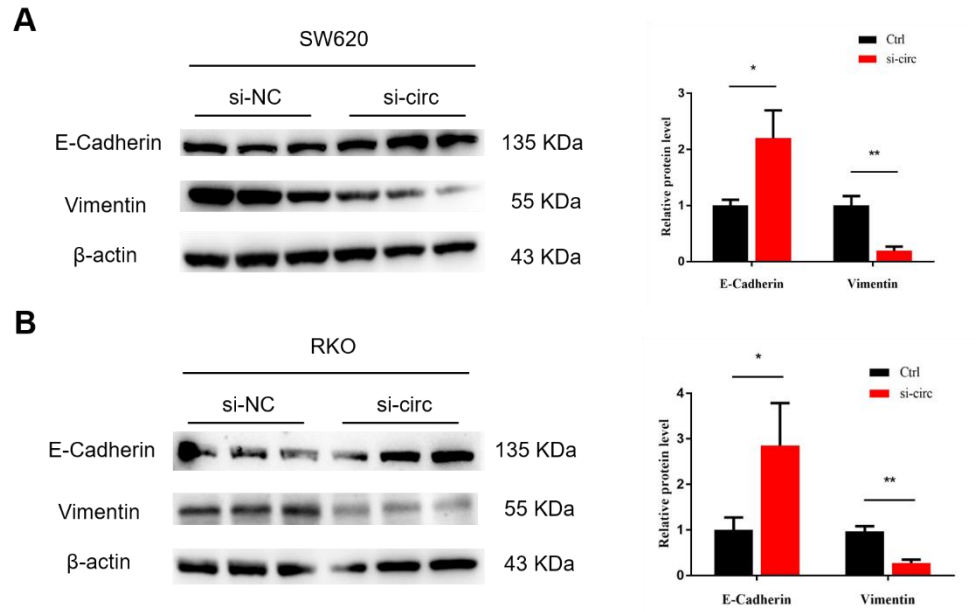

**Supplementary Fig. 9.** The relative protein expression of E-Cadherin and Vimentin were measured by western blot in cells transfected with the circRNA\_0000392 siRNA or negative control.

## Supplementary Tables

**Supplementary Table 1.** Primers and RNA sequences used in this study

| Gene name                          | Forward primer           | Reverse primer          |
|------------------------------------|--------------------------|-------------------------|
| hsa_circ_0000392                   | GCTGAACAGAAGGGCAAGAG     | TTGAAATTTCAACGGTTCC     |
| hsa_circ_0001535                   | CAATGAAGCTATGCAGCAAGA    | CACACCACACTTTGCTGTTGTA  |
| hsa_circ_0003007                   | GCTTTTCTGCCCTCAGACAC     | GGTTGGAACCCAACTACCTG    |
| hsa_circ_0002483                   | GATATGGGCGTCTCCAGTGT     | GCAGCTGCCATTATTTTGCT    |
| $\beta$ -actin                     | GTGGCCGAGGACTTTGATTG     | CCTGTAACAACGCATCTCATATT |
| YAF2                               | ATGAGGGTTACTGGGACTGTAG   | CCTCCGCACATCGCACAT      |
| EPHA2                              | AGAGGCTGAGCGTATCTTCAT    | GGTCCGACTCGGCATAGTAGA   |
| PIK3R3                             | TACAATACGGTGTGGAGTATGGA  | TCATTGGCTTAGGTGGCTTTG   |
| EGFR                               | TTGCCGCAAAGTGTGTAACG     | GTCACCCCTAAATGCCACCG    |
| USP22                              | GGAAAATGCAAGGCGTTGGAG    | GTGCAGTTCGAGGTGATCTTT   |
| DDX58                              | TGTGCTCCTACAGTTGTGGA     | CACTGGGATCTGATTCGCAAAA  |
| miR-193a-5p                        | TATATGGGTCTTTGCGGGCG     | GTGCAGGGTCCGAGGT        |
| U6                                 | CGCAAGGATGACACGCAA       | GTGCAGGGTCCGAGGT        |
| <b>miRNA mimics and inhibitors</b> |                          |                         |
| hsa-miR-193a-5p mimics sense       | UGGGUCUUUGCGGGCGAGAUGA   |                         |
| hsa-miR-193a-5p mimics anti-sense  | AUCUCGCCC GCAAAGACCCAUU  |                         |
| hsa-miR-193a-5p inhibitor          | UGGGUCUUUUUUGCGGGCGAGAUG |                         |
| <b>siRNA</b>                       |                          |                         |

|                                     |                       |
|-------------------------------------|-----------------------|
| Si-hsa_circ_0000392-1<br>sense      | CUCAAGUUACUGAGAAGAATT |
| Si-hsa_circ_0000392-1<br>anti-sense | UUCUUCUCAGUAACUUGAGTT |
| Si-hsa_circ_0000392-2<br>sense      | GUUACUGAGAAGAAAAAGCTT |
| Si-hsa_circ_0000392-2<br>anti-sense | GCUUUUUCUUCUCAGUAACTT |

---



**Supplementary Table 2.** The top 10 upregulated circRNAs and top 10 downregulated circRNAs from the circRNA-seq

| CircRNA ID                 | CircBase ID     | Gene symbol | Fold changes | <i>P</i> -value |
|----------------------------|-----------------|-------------|--------------|-----------------|
| chr12:42604157-42604482-   | circRNA_0000392 | YAF2        | 24.7743759   | 0.0045230371643 |
| chr13:33091994-33101669-   | circRNA_0000471 | N4BP2L2     | 13.5247731   | 0.0069716912671 |
| chr14:32559708-32563592+   | circRNA_0031583 | ARHGAP5     | 12.9699781   | 0.0068609932778 |
| chr19:49994751-49995003+   | NA              | RPL13A      | 9.2143207    | 0.0385458492475 |
| chr11:65267947-65268121+   | NA              | MALAT1      | 7.6726098    | 0.00347182725   |
| chr5:137320946-137324004-  | circRNA_0001535 | FAM13B      | 7.5234613    | 0.0243299719178 |
| chr20:57014001-57016139+   | circRNA_0001173 | VAPB        | 5.9031048    | 0.0214436499341 |
| chr15:101104897-101105470- | circRNA_0003007 | LINS        | 5.4840268    | 0.0291610480461 |
| chr3:195415404-195416309+  | circRNA_0008267 | LINC00969   | 5.2272882    | 0.0326334735724 |
| chr8:141874411-141900868-  | NA              | DNAJC3      | 5.1256745    | 0.0461082775399 |
| chr6:131247745-131277639-  | circRNA_0077837 | EPB41L2     | -16.5373925  | 0.0160833348308 |
| chr21:9826186-9826580+     | NA              | MIR3687-1   | -12.4397176  | 0.0331224378607 |
| chr5:76758920-76760634-    | circRNA_0001498 | WDR41       | -9.1724693   | 0.0310305925516 |

|                           |                 |             |            |                 |
|---------------------------|-----------------|-------------|------------|-----------------|
| chr14:50320581-50329515-  | NA              | Metazoa_SRP | -8.5730967 | 0.0149285105264 |
| chr8:131370263-131374017- | circRNA_0085616 | ASAP1       | -6.556057  | 0.0184800508094 |
| chr8:68117578-68118947-   | NA              | ARFGEF1     | -5.4591184 | 0.0438781345434 |
| chr11:65267861-65268260+  | NA              | MALAT1      | -5.4591184 | 0.0428605568472 |
| chr7:24663285-24720139+   | circRNA_0001687 | MPP6        | -4.8635216 | 0.0485052074575 |
| chr11:65267937-65268108-  | NA              | XLOC_009474 | -4.4665897 | 0.0487781568928 |
| chr11:65267941-65268112-  | NA              | XLOC_009474 | -4.4665897 | 0.0487781568928 |

---
